# Supplementary material for: Antimicrobial activity of a quaternized BODIPY against Staphylococcus strains
Source: Royal Society of Chemistry journal article supplement (doi:10.1039/c5ob02477c), 2016-01-01

## Supporting Information

for

### Antimicrobial activity of a quaternized BODIPY against *Staphylococcus* strains

Duygu Aydın Tekdaş<sup>a</sup>, Geetha Viswanathan<sup>b</sup>, Sevinc Zehra Topal<sup>a</sup>, Chung Yeng Looi<sup>c</sup>, Won Fen Wong<sup>d</sup>, Grace Min Yi Tan<sup>d</sup>, Yunus Zorlu<sup>a</sup>, Ayşe Gül Gürek<sup>a\*</sup>, Hong Boon Lee<sup>b\*</sup> and Fabienne Dumoulin<sup>a\*</sup>

<sup>a</sup> *Gebze Technical University, Department of Chemistry, P.O.box 141, 41400 Gebze Kocaeli, Turkey*

<sup>b</sup> *Department of Pharmacy, Faculty of Medicine, University of Malaya, 50603 Kuala Lumpur, Malaysia*

<sup>c</sup> *Department of Pharmacology or Medical Microbiology, Faculty of Medicine, University of Malaya, 50603 Kuala Lumpur, Malaysia*

<sup>d</sup> *Department of Medical Microbiology, Faculty of Medicine, University of Malaya, 50603 Kuala Lumpur, Malaysia*

## Content

### **X-Ray crystallography**

**Table S1.** Crystal data and refinement parameters for **3**, **4**, and **5**.

### **Characterizations**

**Fig. S1** ATR-IR spectrum of compound **3**

**Fig. S2** MALDI-TOF-MS spectrum of **3** (matrix: DHB)

**Fig. S3**  $^1\text{H}$  NMR of compound **3** in  $\text{DMSO-}d_6$

**Fig. S4**  $^{13}\text{C}$ -NMR of compound **3** in  $\text{DMSO-}d_6$

**Fig. S5** Crystal structure of compound **3**

**Fig. S6** ATR-IR spectrum of compound **4**

**Fig. S7** ESI-MS spectrum of compound **4**

**Fig. S8**  $^1\text{H}$  NMR of compound **4** in  $\text{DMSO-}d_6$

**Fig. S9**  $^{13}\text{C}$ -NMR of compound **4** in  $\text{DMSO-}d_6$

**Fig. S10.** Crystal structure of compound **4**

**Fig. S11** ATR-IR spectrum of compound **5**

**Fig. S12** HRMS spectrum of compound **5**

**Fig. S13** MALDI-TOF-MS spectrum of compound **5**

**Fig. S14**  $^1\text{H}$  NMR of compound **5** in  $\text{DMSO-}d_6$

**Fig. S15**  $^{13}\text{C}$ -NMR of compound **5** in  $\text{DMSO-}d_6$

**Fig.S16.** Crystal structure of compound **5**

**Fig. S17.** Crystal packing of compound **5**

### **Photophysics and photochemistry**

### **References**

### **Checkcif files**

## X-Ray crystallography

Data for three compounds (for **3**, **4**, and **5**) were obtained with Bruker APEX II QUAZAR three-circle diffractometer. Indexing was performed using APEX2 [1]. Data integration and reduction were carried out with SAINT. [2]. Absorption correction was performed by multi-scan method implemented in SADABS [3]. The structures were solved using the direct methods procedure in SHELXS-97 [4] and then refined by full-matrix least-squares refinements on  $F^2$  using the SHELXL-97 [4]. All non-hydrogen atoms were refined anisotropically using all reflections with  $I > 2\sigma(I)$ . C-bound H atoms were positioned geometrically and refined using a riding mode. For **4**, N-bound H atoms were located from the difference Fourier map and restrained to be 0.89 Å from N atom using DFIX and its position was constrained to refine on its parent N atom with  $U_{iso}(H) = 1.2U_{eq}(N)$ . Crystallographic data and refinement details of **3**, **4**, and **5** are summarized in Table S1. Crystal structure validations and geometrical calculations were performed using Platon software [5]. Mercury software [6] was used for visualization of the cif files.

**Table S1.** Crystal data and refinement parameters for **3**, **4**, and **5**.

| Crystal parameters                    | <b>3</b>                                                                      | <b>4</b>                                                         | <b>5</b>                                                                        |
|---------------------------------------|-------------------------------------------------------------------------------|------------------------------------------------------------------|---------------------------------------------------------------------------------|
| CCDC                                  | 979889                                                                        | 979886                                                           | 979888                                                                          |
| Empirical Formula                     | C <sub>19</sub> H <sub>18</sub> BF <sub>2</sub> N <sub>3</sub> O <sub>2</sub> | C <sub>21</sub> H <sub>26</sub> BF <sub>2</sub> N <sub>3</sub> O | C <sub>23</sub> H <sub>29</sub> BCl <sub>2</sub> F <sub>2</sub> IN <sub>3</sub> |
| Formula weight (g.mol <sup>-1</sup> ) | 369.17                                                                        | 385.26                                                           | 594.10                                                                          |
| Temperature (K)                       | 120(2)                                                                        | 120(2)                                                           | 150(2)                                                                          |
| Wavelength (Å)                        | 0.71073                                                                       | 0.71073                                                          | 0.71073                                                                         |
| Crystal system                        | Monoclinic                                                                    | Monoclinic                                                       | Triclinic                                                                       |

| Space group                                           | P2 <sub>1</sub> /n                                                 | P2 <sub>1</sub> /n                                                 | P-1                                                                |
|-------------------------------------------------------|--------------------------------------------------------------------|--------------------------------------------------------------------|--------------------------------------------------------------------|
| <i>a</i> (Å)                                          | 6.8808(5)                                                          | 16.4780(12)                                                        | 8.5150(5)                                                          |
| <i>b</i> (Å)                                          | 8.3233(6)                                                          | 7.1238(5)                                                          | 9.7941(6)                                                          |
| <i>c</i> (Å)                                          | 30.274(2)                                                          | 17.2258(12)                                                        | 17.2071(10)                                                        |
| $\alpha$ (°)                                          | 90                                                                 | 90                                                                 | 76.580(3)                                                          |
| $\beta$ (°)                                           | 95.360(3)                                                          | 101.934(4)                                                         | 76.491(3)                                                          |
| $\gamma$ (°)                                          | 90                                                                 | 90                                                                 | 75.658(4)                                                          |
| Crystal size (mm)                                     | 0.20 x 0.25 x 0.30                                                 | 0.13 x 0.29 x 0.38                                                 | 0.07 x 0.07 x 0.15                                                 |
| <i>V</i> (Å <sup>3</sup> )                            | 1726.2(2)                                                          | 1978.4(2)                                                          | 1328.51(14)                                                        |
| <i>Z</i>                                              | 4                                                                  | 4                                                                  | 2                                                                  |
| $\rho_{\text{calcd}}$ (g.cm <sup>-3</sup> )           | 1.421                                                              | 1.293                                                              | 1.485                                                              |
| $\mu$ (mm <sup>-1</sup> )                             | 0.107                                                              | 0.093                                                              | 1.436                                                              |
| <i>F</i> (000)                                        | 768                                                                | 816                                                                | 596                                                                |
| $\theta$ range for data collection (°)                | 1.35 - 25.03                                                       | 1.56 - 25.04                                                       | 2.18 - 25.00                                                       |
| <i>h/k/l</i>                                          | -8,8/-9,9/-36,36                                                   | -19/19, -8/8, -20/20                                               | -10/10, -11/11, -20/20                                             |
| Reflections collected                                 | 25089                                                              | 18188                                                              | 30188                                                              |
| Independent reflections                               | 3038                                                               | 3510                                                               | 4684                                                               |
| Absorption correction                                 | Multi-scan                                                         | Multi-scan                                                         | Multi-scan                                                         |
| Data/restraints/parameters                            | 3038 / 0 / 248                                                     | 3510 / 2 / 265                                                     | 4684 / 0 / 296                                                     |
| Goodness-of-fit on <i>F</i> <sup>2</sup> (S)          | 1.133                                                              | 1.040                                                              | 1.091                                                              |
| Final R indices [ <i>I</i> > 2 $\sigma$ ( <i>I</i> )] | <i>R</i> <sub>I</sub> = 0.0405,<br><i>wR</i> <sub>2</sub> = 0.1008 | <i>R</i> <sub>I</sub> = 0.0525,<br><i>wR</i> <sub>2</sub> = 0.1449 | <i>R</i> <sub>I</sub> = 0.0852,<br><i>wR</i> <sub>2</sub> = 0.2100 |
| R indices (all data)                                  | <i>R</i> <sub>I</sub> = 0.0434,<br><i>wR</i> <sub>2</sub> = 0.1023 | <i>R</i> <sub>I</sub> = 0.0700,<br><i>wR</i> <sub>2</sub> = 0.1582 | <i>R</i> <sub>I</sub> = 0.1216,<br><i>wR</i> <sub>2</sub> = 0.2288 |
| Largest diff. peak and hole (e.Å <sup>-3</sup> )      | 0.186 and -0.231                                                   | 0.318 and -0.240                                                   | 1.795 and -1.450                                                   |

## Characterization spectra

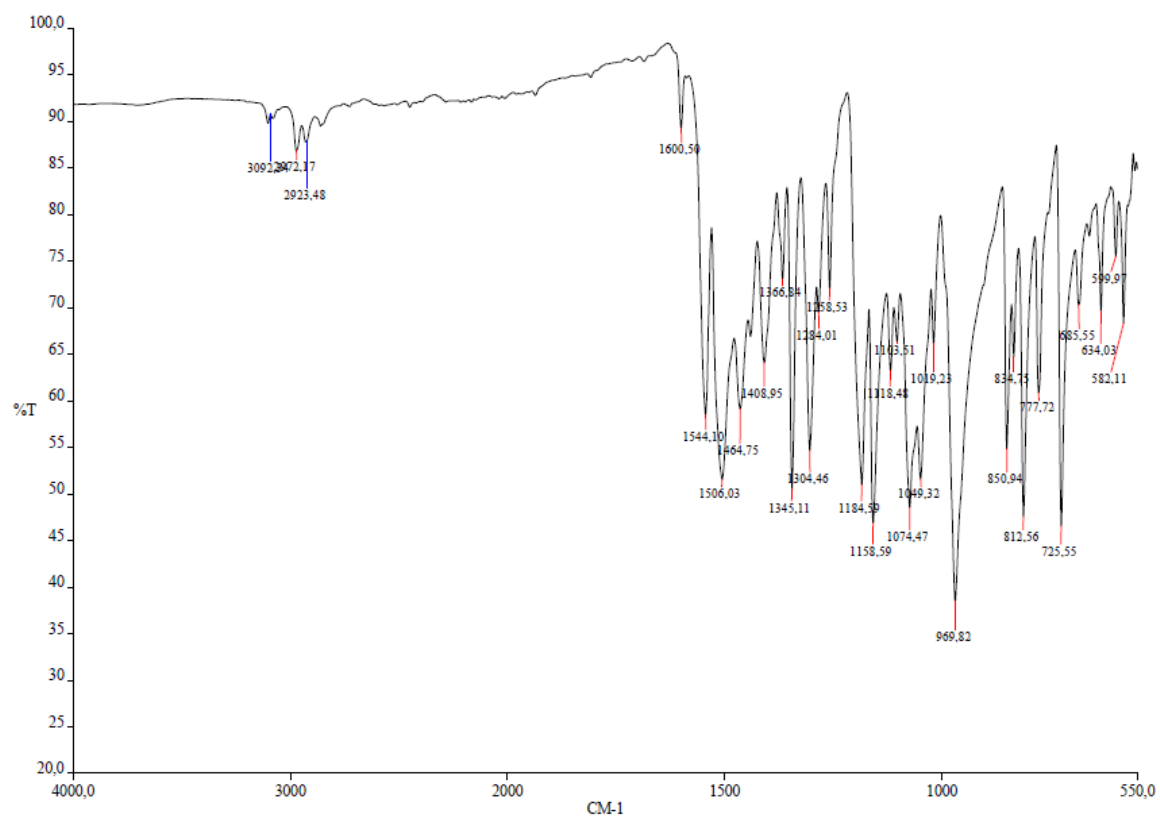

**Figure S1.** ATR-IR spectrum of **3**

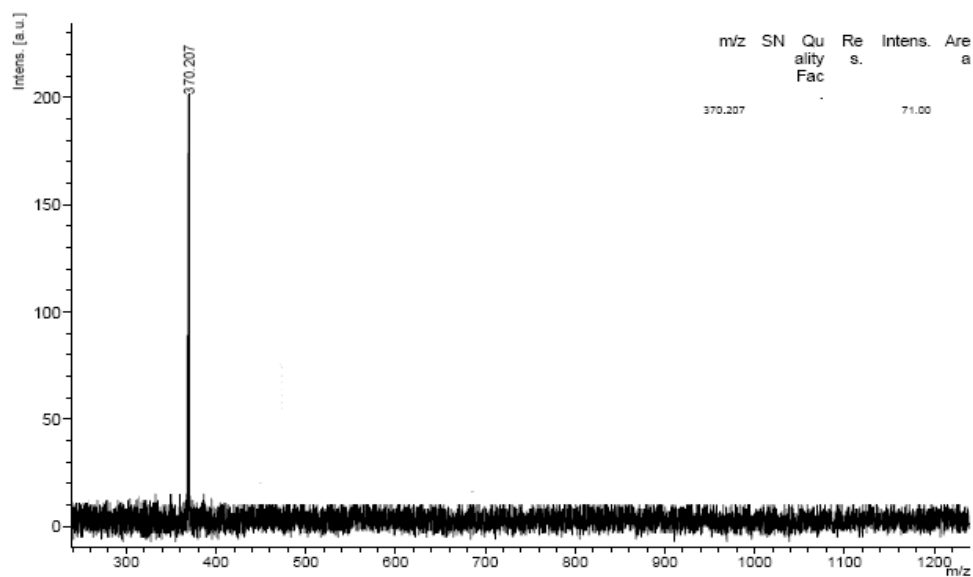

**Figure S2.** MALDI-TOF-MS spectrum of **3** (matrix: DHB).

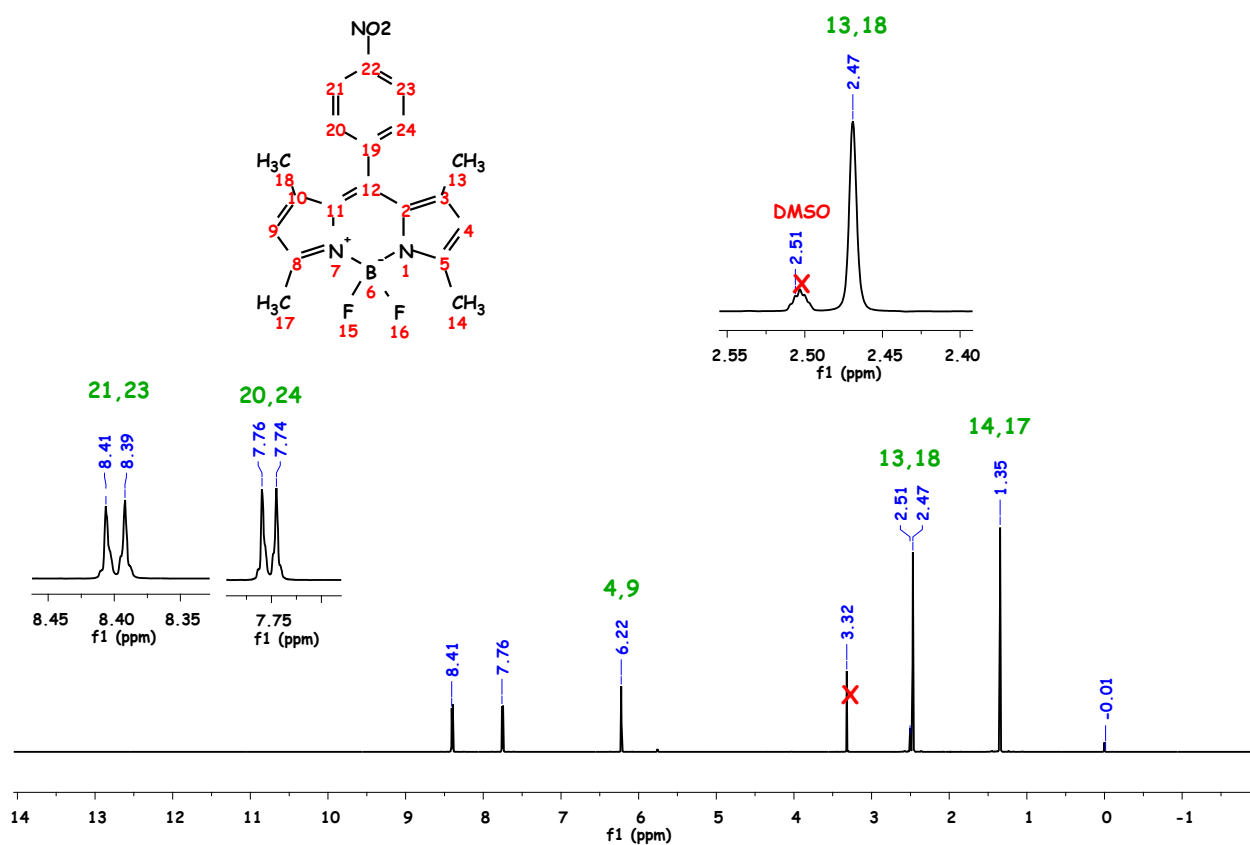

**Figure S3.**  $^1\text{H}$  NMR spectrum of **3** in  $\text{DMSO}-d_6$

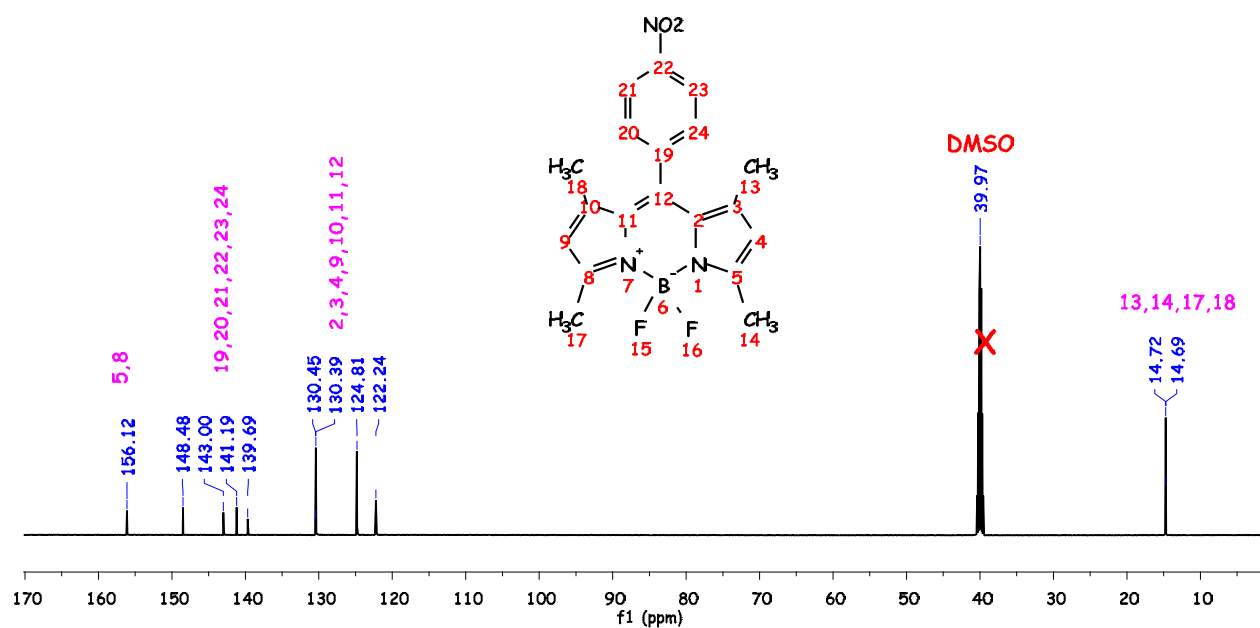

**Figure S4.**  $^{13}\text{C}$  NMR spectrum of **3** in  $\text{DMSO}-d_6$

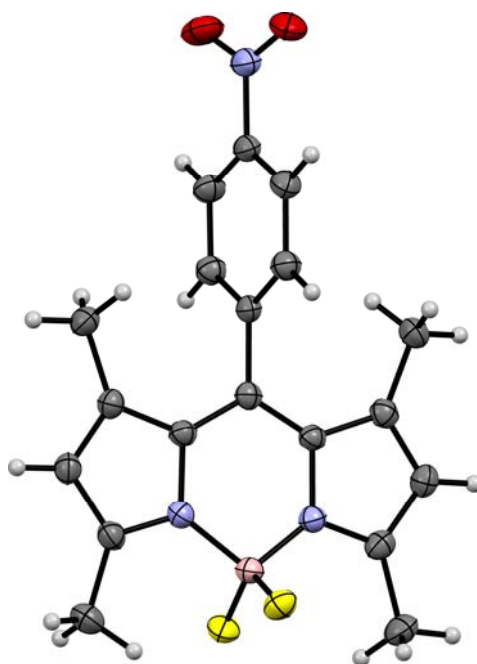

**Figure S5.** Crystal structure of compound **3**. Displacement ellipsoids are drawn at the 50% probability level. H-atoms are shown as small spheres of arbitrary radii. The red, grey, blue, pink, yellow, and white coloured atoms represent O, C, N, B, F, and H, respectively.

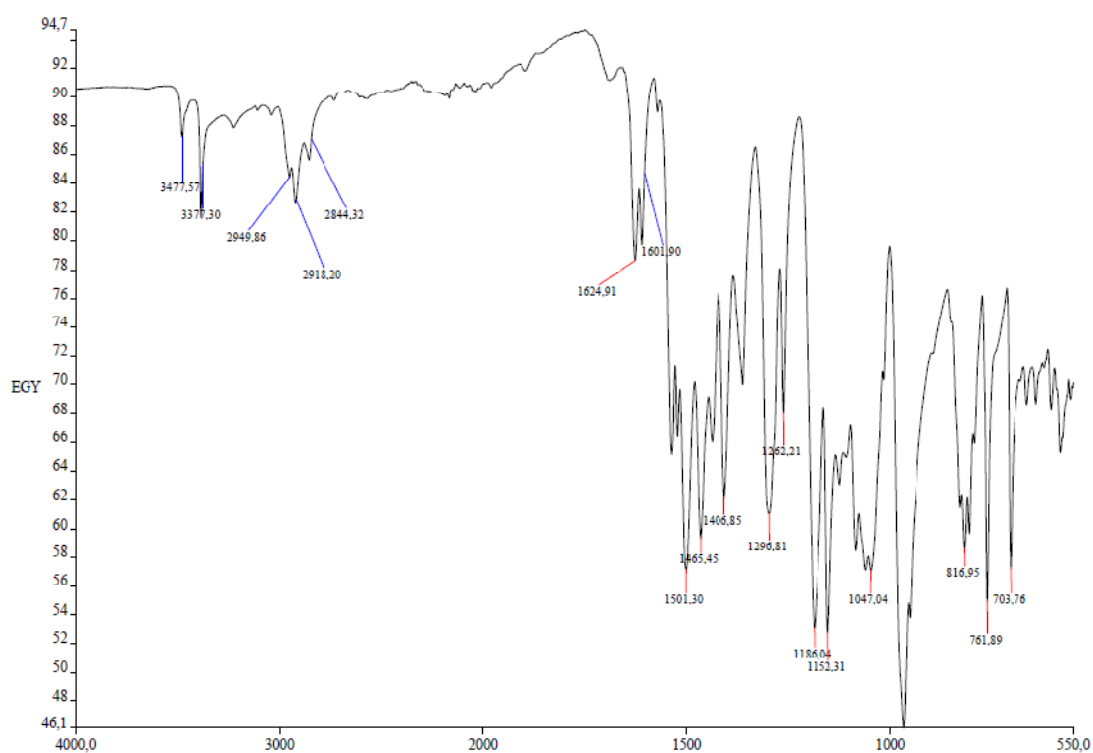

**Figure S6.** ATR-IR spectrum of **4**.

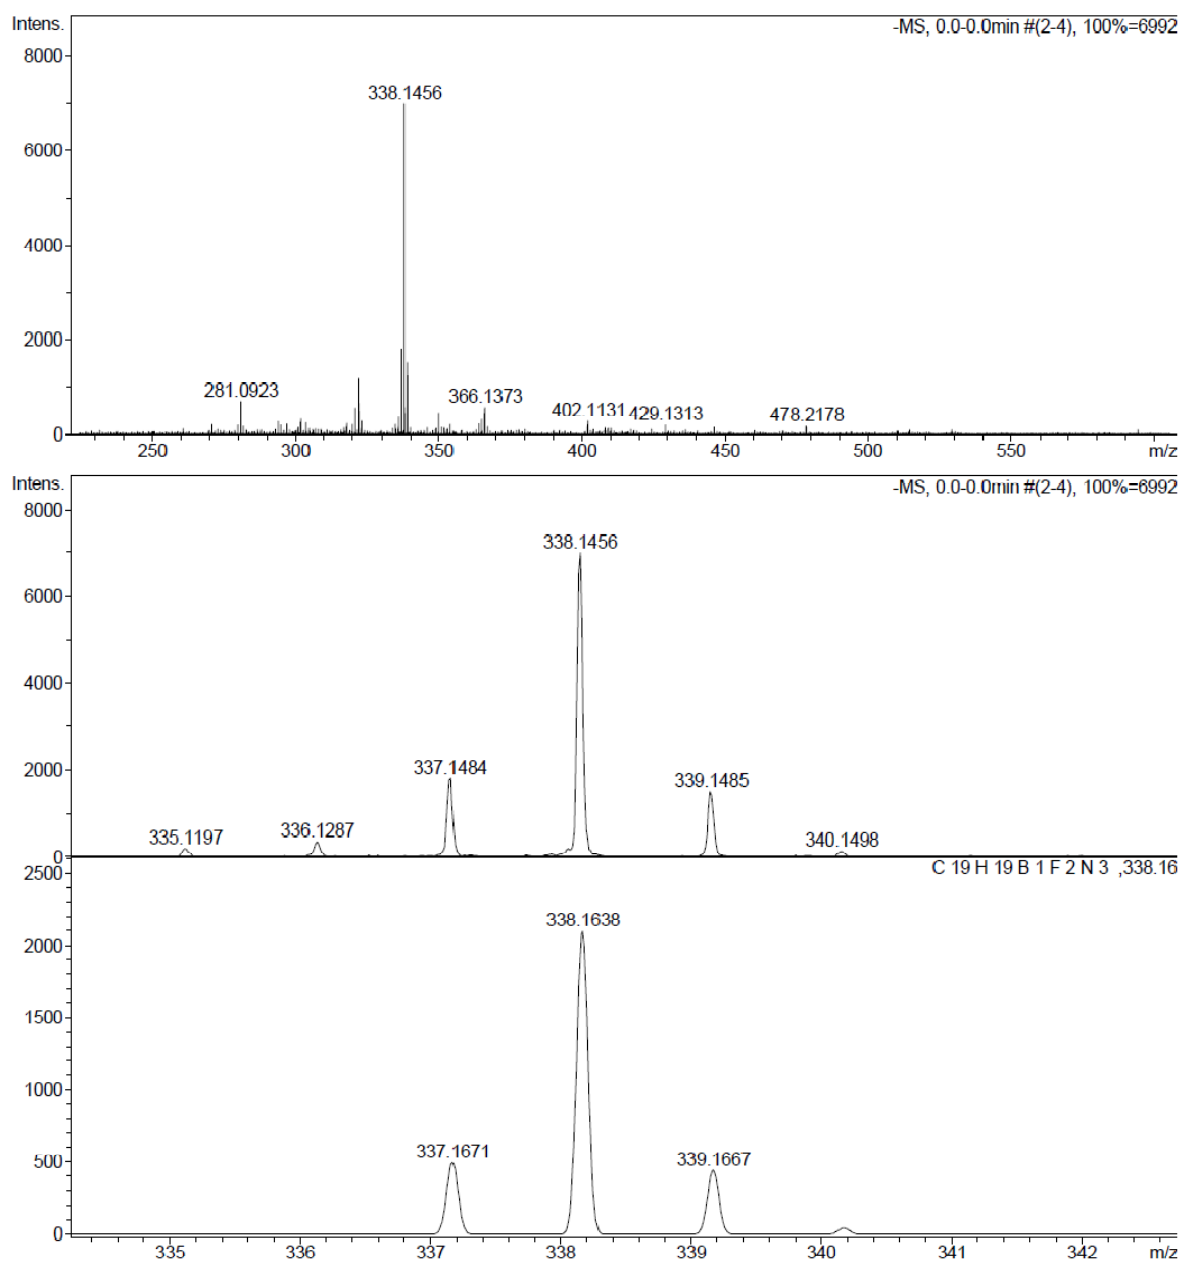

**Figure S7.** ESI-MS spectrum of **4**.

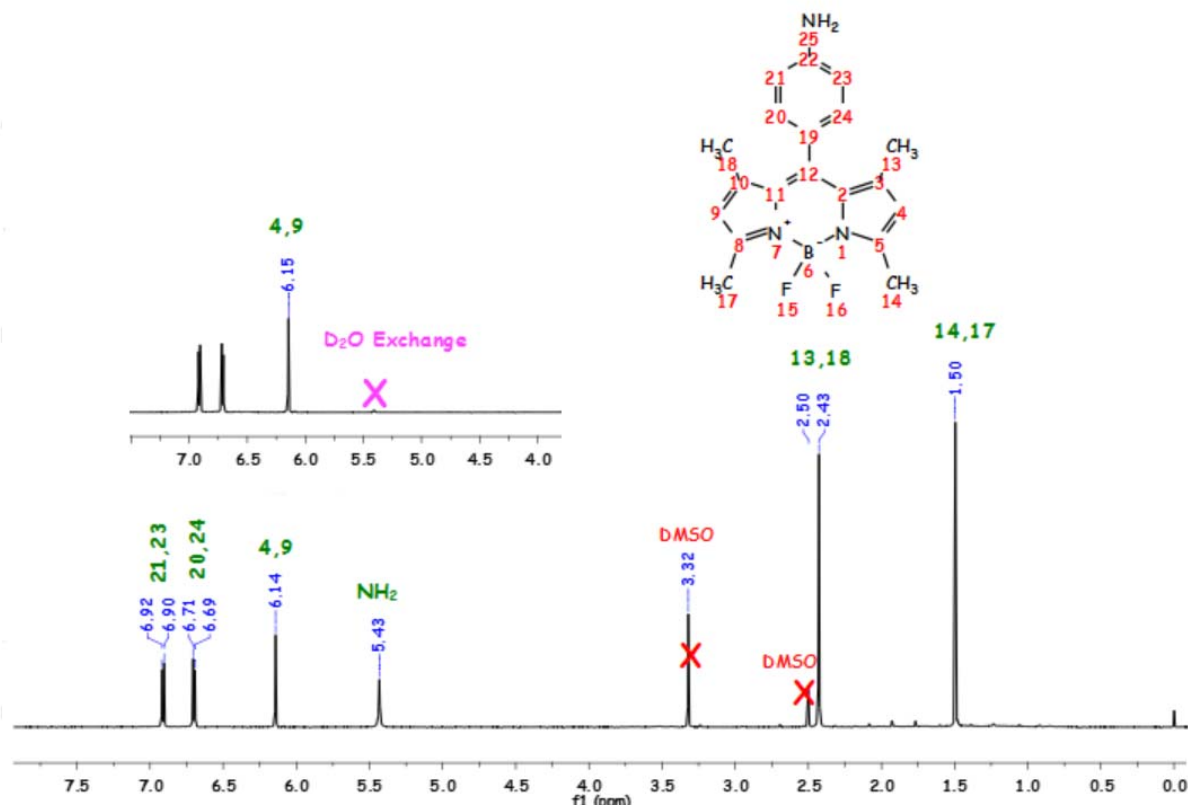

**Figure S8.** <sup>1</sup>H NMR spectrum of **4** in DMSO-*d*<sub>6</sub>

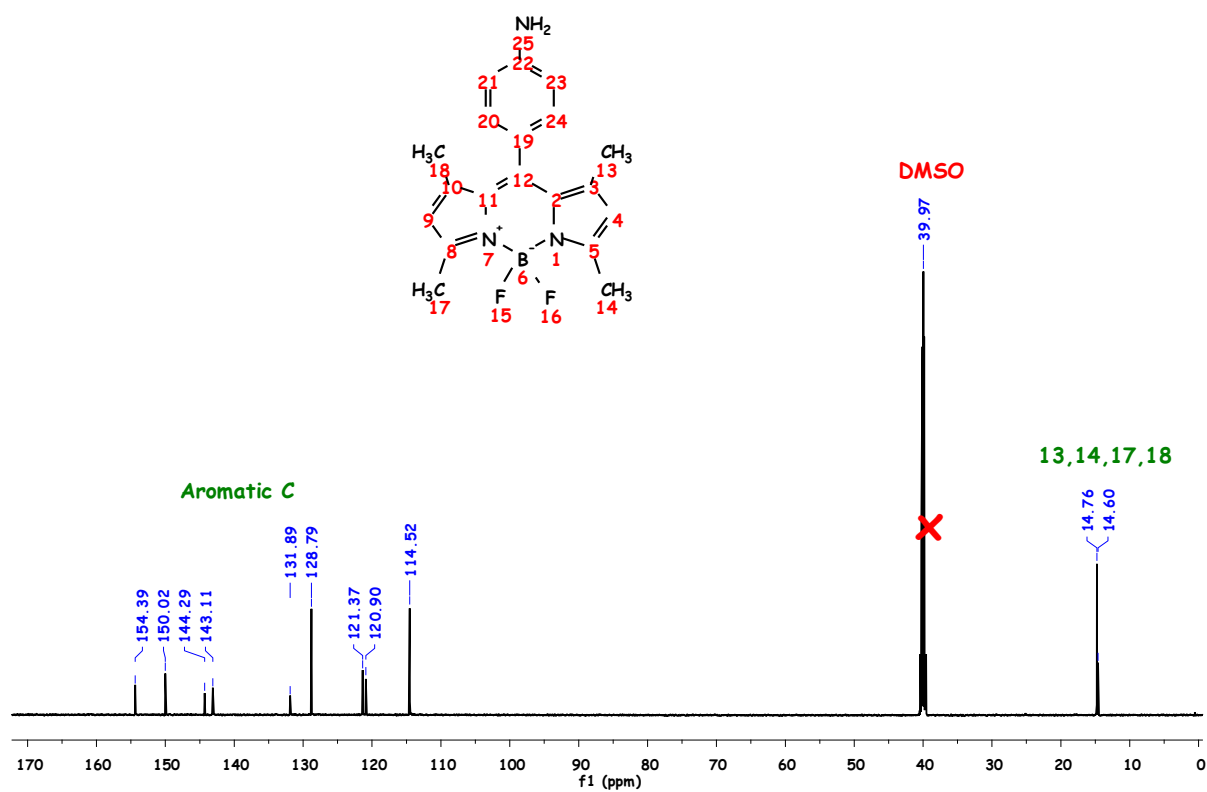

**Figure S9.** <sup>13</sup>C NMR spectrum of **4** in DMSO-*d*<sub>6</sub>

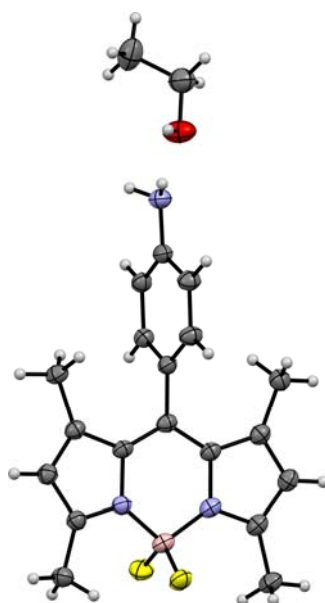

**Figure S10.** Crystal structure of compound **4** with EtOH solvate. Displacement ellipsoids are drawn at the 30% probability level. H-atoms are shown as small spheres of arbitrary radii. The red, grey, blue, pink, yellow, and white coloured atoms represent O, C, N, B, F, and H, respectively.

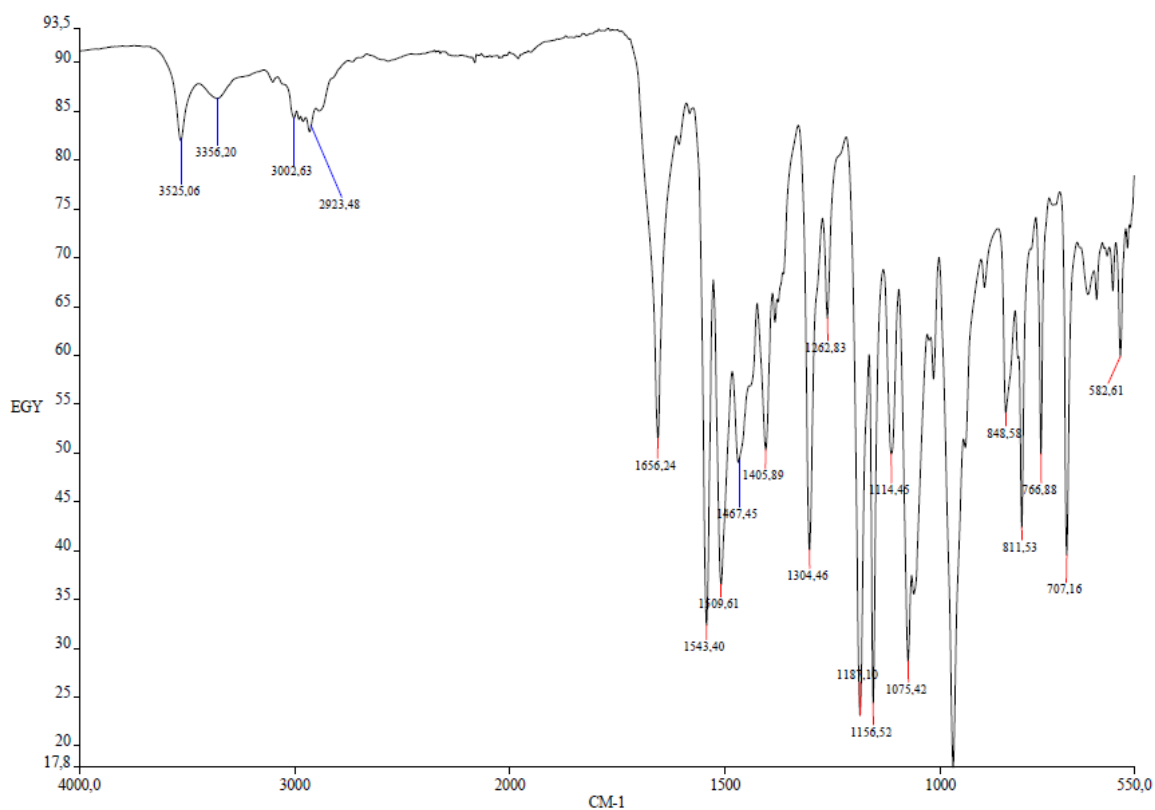

**Figure S11.** ATR-IR spectrum of **5**.

## Mass Spectrum Molecular Formula Report

### Analysis Info

Analysis Name D:\Data\bodipy-quaterner-1.d  
Method gok\_tune\_wide.m  
Sample Name  
Comment

Acquisition Date 12/26/2013 10:53:30 AM

Operator bruker customer  
Instrument / Ser# micrOTOF-Q 55

### Acquisition Parameter

|             |            |                       |           |                  |           |
|-------------|------------|-----------------------|-----------|------------------|-----------|
| Source Type | ESI        | Ion Polarity          | Positive  | Set Nebulizer    | 0.4 Bar   |
| Focus       | Not active | Set Capillary         | 5000 V    | Set Dry Heater   | 200 °C    |
| Scan Begin  | 200 m/z    | Set End Plate Offset  | -400 V    | Set Dry Gas      | 4.0 l/min |
| Scan End    | 450 m/z    | Set Collision Cell RF | 600.0 Vpp | Set Divert Valve | Waste     |

### Generate Molecular Formula Parameter

|                  |                |                        |         |         |   |
|------------------|----------------|------------------------|---------|---------|---|
| Formula, min.    | C17            |                        |         |         |   |
| Formula, max.    | F2-B-N3-O0-C25 |                        |         |         |   |
| Measured m/z     | 382.226        | Tolerance              | 0.5 mDa | Charge  | 1 |
| Check Valence    | no             | Minimum                | 0       | Maximum | 0 |
| Nitrogen Rule    | no             | Electron Configuration | both    |         |   |
| Filter H/C Ratio | no             | Minimum                | 0       | Maximum | 3 |
| Estimate Carbon  | yes            |                        |         |         |   |

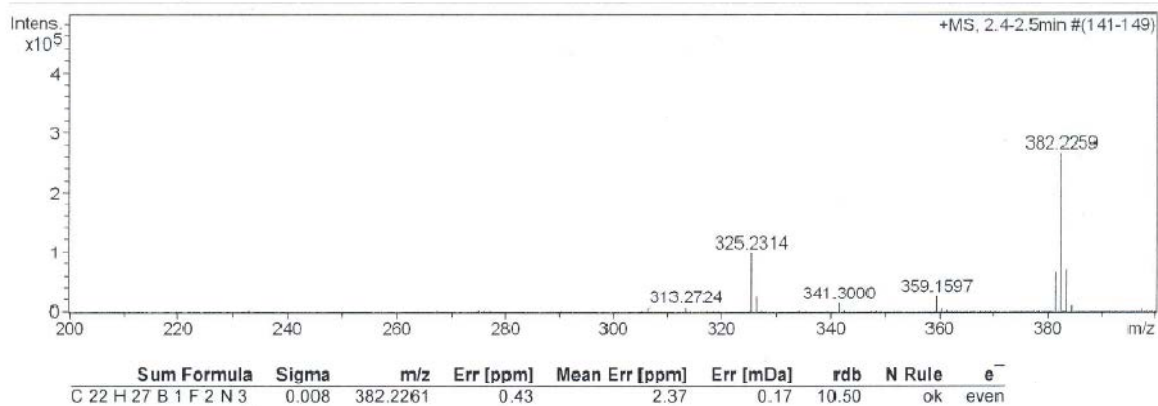

Figure S12. HRMS spectrum of **5**

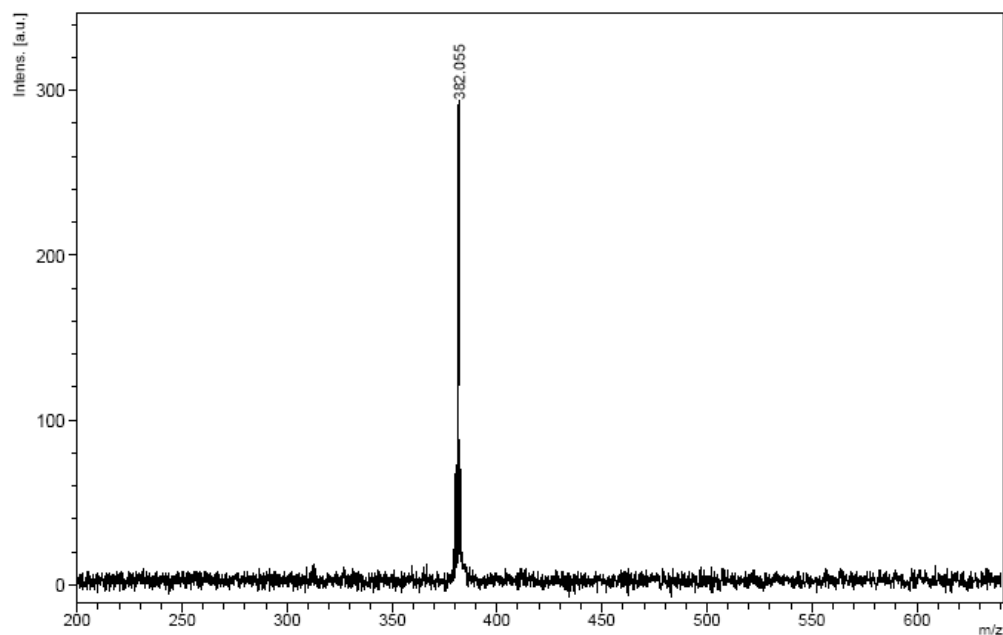

Figure S13. MALDI-TOF-MS spectrum of **5** (no matrix)

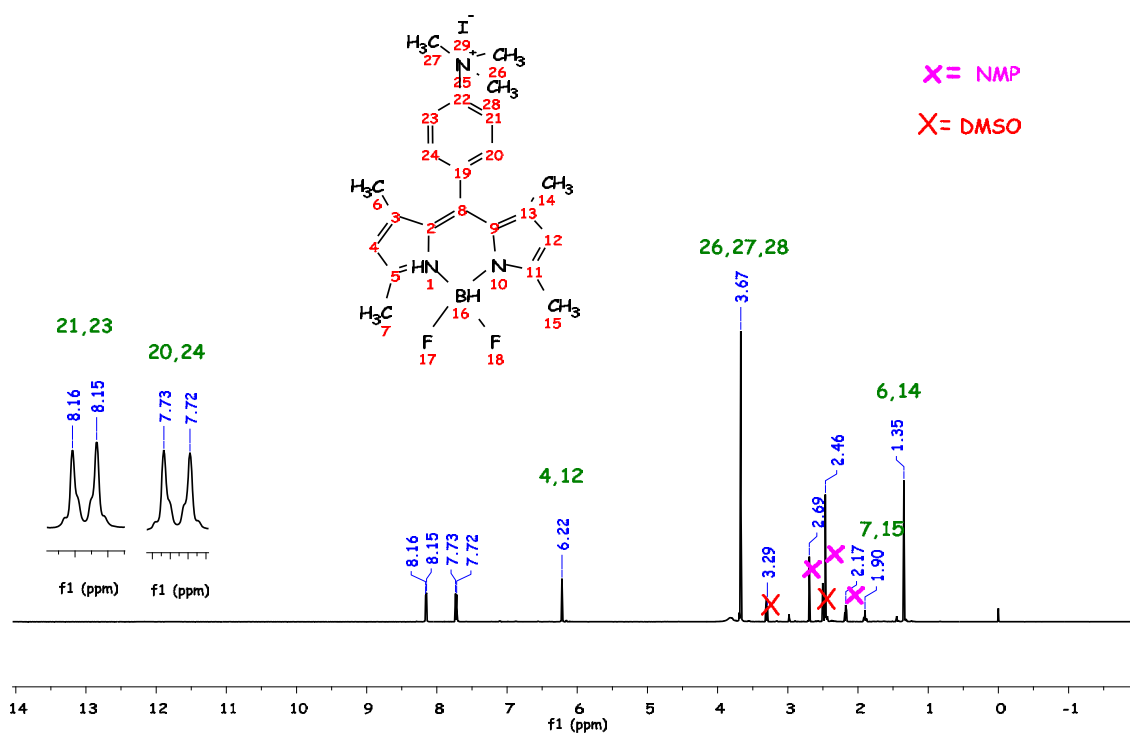

**Figure S14.**  $^1\text{H}$  NMR spectrum of **5** in DMSO-*d*<sub>6</sub>

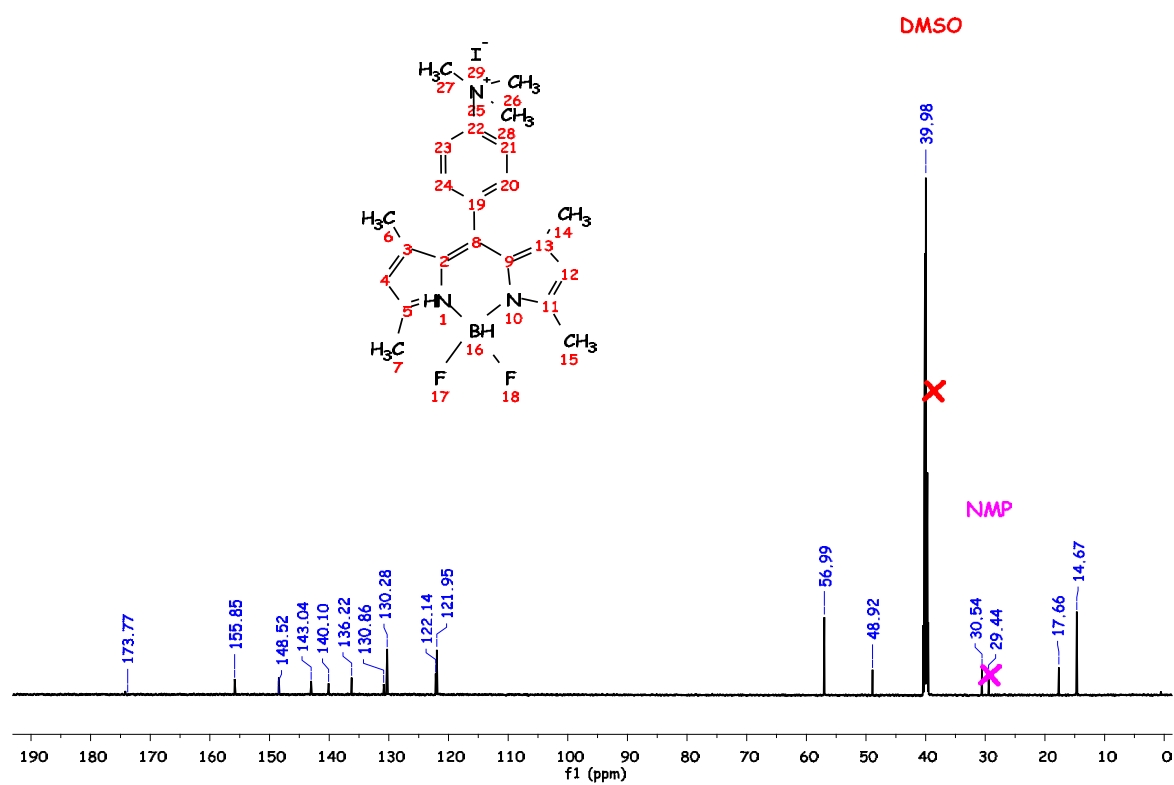

**Figure S15.**  $^{13}\text{C}$  NMR spectrum of **5** in DMSO-*d*<sub>6</sub>

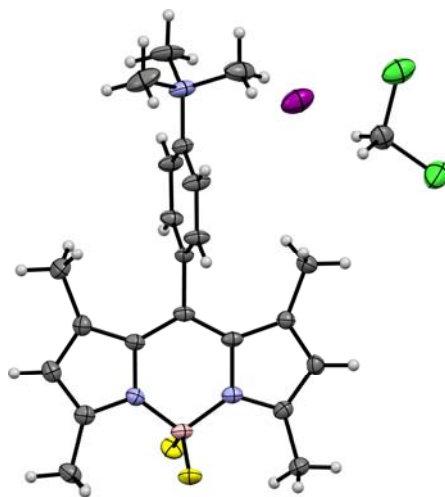

**Figure S16.** Crystal structure of compound **5** with DCM solvate. Displacement ellipsoids are drawn at the 20% probability level. H-atoms are shown as small spheres of arbitrary radii. The grey, blue, pink, yellow, purple, green and white coloured atoms represent C, N, B, F, I, Cl and H, respectively.

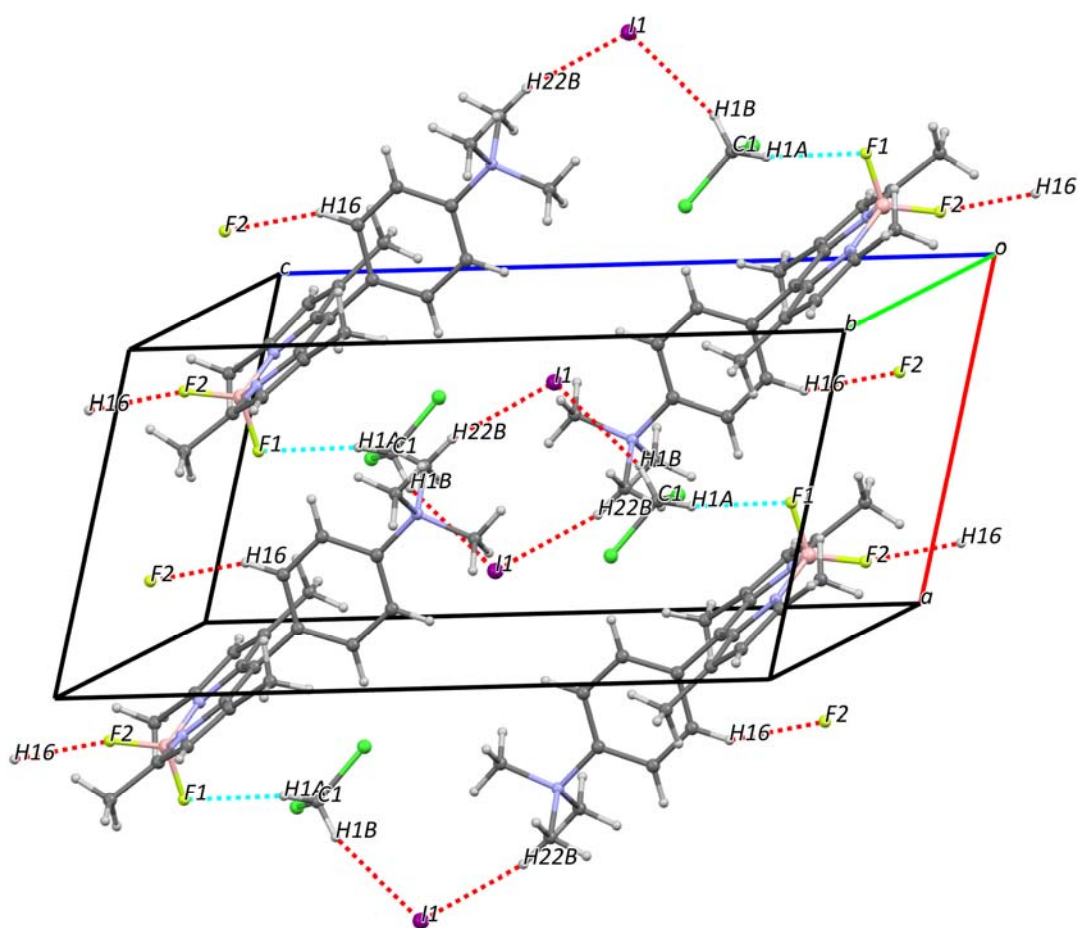

**Figure S17.** Perspective view of crystal packing of compound **5**, showing C-H...F, C-H...I interactions.

## Photophysics and photochemistry

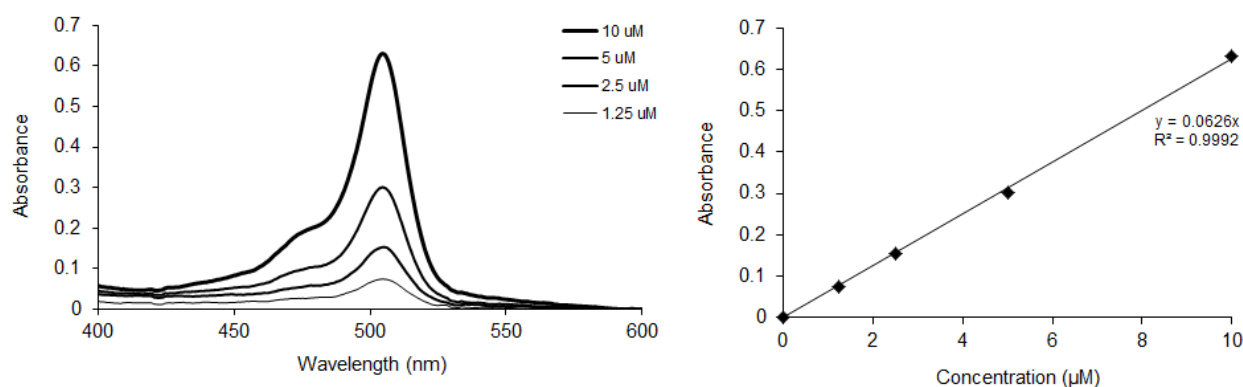

**Figure S18.** Left: Absorption spectra of **5** in DMSO at different four concentrations, Right: Absorbance vs concentration.

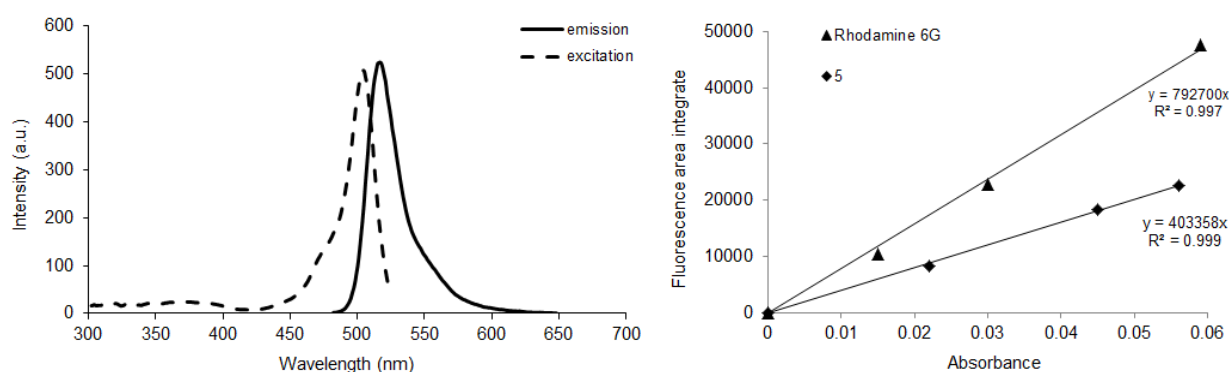

**Figure S19.** Left: Fluorescence excitation and emission spectra of **5** in DMSO (5  $\mu\text{M}$ ), Right: Fluorescence area integrate vs absorbance of **5** in DMSO and Rhodamine 6G in water at different three concentrations.

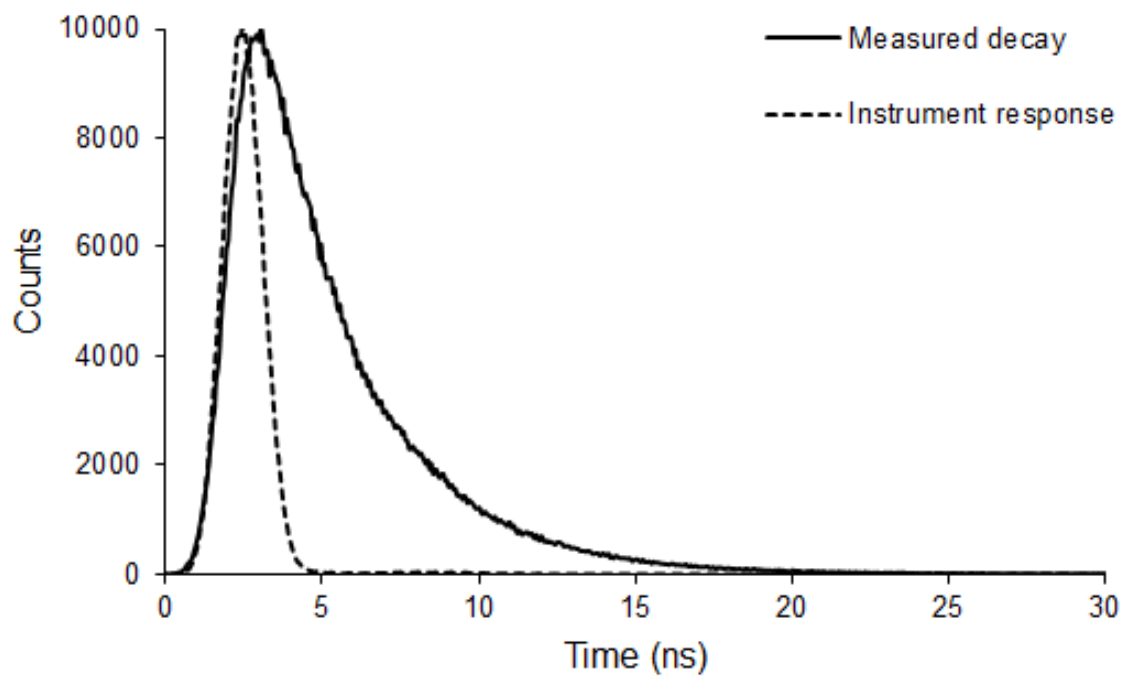

**Figure S20.** Fluorescence lifetime decay profile of **5** in DMSO.

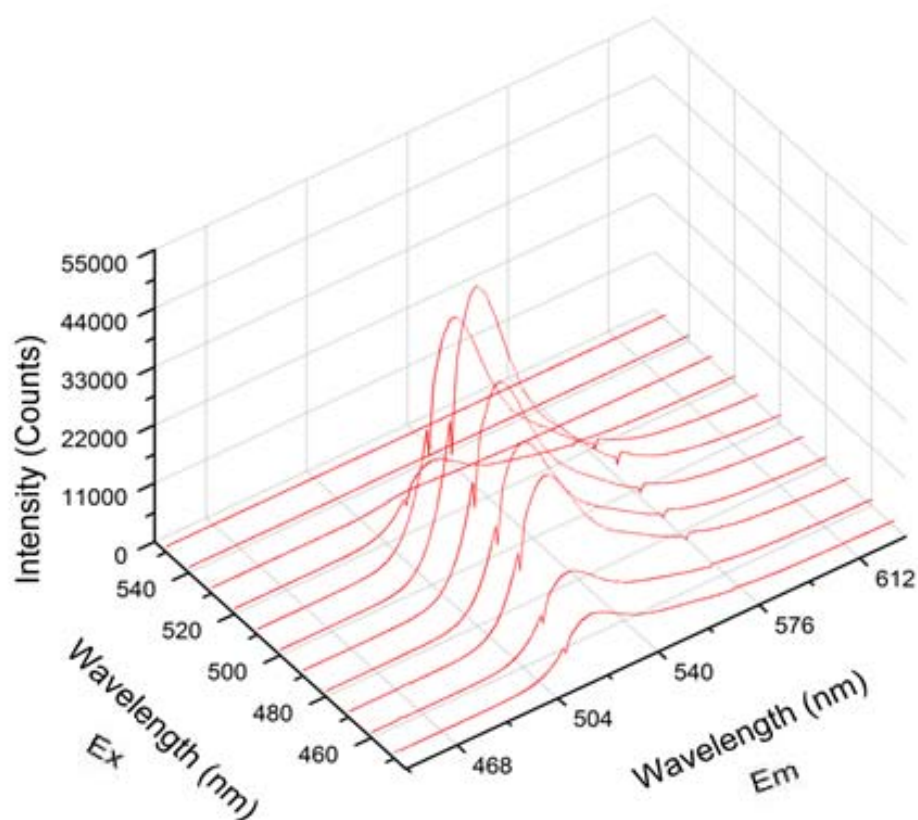

**Figure S21.** 3D fluorescence emission spectra in DMSO (excitation ranges from 450 to 550 nm).

## References

1. APEX2, version 2010.5-0, Bruker (2010), Bruker AXS Inc., Madison, WI.
2. SAINT, version 7.67A, Bruker (2009), Bruker AXS Inc., Madison, WI.
3. SADABS, version 2008/1, Bruker (2008), Bruker AXS Inc., Madison, WI.
4. G. M. Sheldrick, *Acta Cryst.*, 2008, **A64**, 112-122.
5. A. L. Spek, *Acta Cryst.* 2009, **D65**, 148-155.
6. C. F. Macrae, P. R. Edgington, P. McCabe, E. Pidcock, G. P. Shields, R. Taylor, M. Towler, J. van de Streek, *J. Appl. Cryst.*, 2006, **39**, 453-457.

# checkCIF/PLATON report

You have not supplied any structure factors. As a result the full set of tests cannot be run.

THIS REPORT IS FOR GUIDANCE ONLY. IF USED AS PART OF A REVIEW PROCEDURE FOR PUBLICATION, IT SHOULD NOT REPLACE THE EXPERTISE OF AN EXPERIENCED CRYSTALLOGRAPHIC REFEREE.

No syntax errors found.      CIF dictionary      Interpreting this report

## Datablock: I

---

Bond precision:    C-C = 0.0027 Å                      Wavelength=0.71073

Cell:                      a=6.8808(5)              b=8.3233(6)              c=30.274(2)  
                            alpha=90              beta=95.360(3)              gamma=90

Temperature:              120 K

|                | Calculated         | Reported           |
|----------------|--------------------|--------------------|
| Volume         | 1726.2(2)          | 1726.2(2)          |
| Space group    | P 21/n             | P 1 21/n 1         |
| Hall group     | -P 2yn             | -P 2yn             |
| Moiety formula | C19 H18 B F2 N3 O2 | ?                  |
| Sum formula    | C19 H18 B F2 N3 O2 | C19 H18 B F2 N3 O2 |
| Mr             | 369.17             | 369.17             |
| Dx,g cm-3      | 1.421              | 1.421              |
| Z              | 4                  | 4                  |
| Mu (mm-1)      | 0.107              | 0.107              |
| F000           | 768.0              | 768.0              |
| F000'          | 768.41             |                    |
| h,k,lmax       | 8,9,36             | 8,9,36             |
| Nref           | 3045               | 3038               |
| Tmin,Tmax      | 0.968,0.979        | 0.880,0.980        |
| Tmin'          | 0.968              |                    |

Correction method= MULTI-SCAN

Data completeness= 0.998                      Theta(max)= 25.030

R(reflections)= 0.0405( 2815)              wR2(reflections)= 0.1023( 3038)

S = 1.133                      Npar= 248

---

The following ALERTS were generated. Each ALERT has the format  
**test-name\_ALERT\_alert-type\_alert-level.**  
Click on the hyperlinks for more details of the test.

---

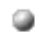

## Alert level G

PLAT005\_ALERT\_5\_G No \_iucr\_refine\_instructions\_details in the CIF Please Do !

---

0 **ALERT level A** = Most likely a serious problem - resolve or explain  
0 **ALERT level B** = A potentially serious problem, consider carefully  
0 **ALERT level C** = Check. Ensure it is not caused by an omission or oversight  
1 **ALERT level G** = General information/check it is not something unexpected

0 ALERT type 1 CIF construction/syntax error, inconsistent or missing data  
0 ALERT type 2 Indicator that the structure model may be wrong or deficient  
0 ALERT type 3 Indicator that the structure quality may be low  
0 ALERT type 4 Improvement, methodology, query or suggestion  
1 ALERT type 5 Informative message, check

---

It is advisable to attempt to resolve as many as possible of the alerts in all categories. Often the minor alerts point to easily fixed oversights, errors and omissions in your CIF or refinement strategy, so attention to these fine details can be worthwhile. In order to resolve some of the more serious problems it may be necessary to carry out additional measurements or structure refinements. However, the purpose of your study may justify the reported deviations and the more serious of these should normally be commented upon in the discussion or experimental section of a paper or in the "special\_details" fields of the CIF. checkCIF was carefully designed to identify outliers and unusual parameters, but every test has its limitations and alerts that are not important in a particular case may appear. Conversely, the absence of alerts does not guarantee there are no aspects of the results needing attention. It is up to the individual to critically assess their own results and, if necessary, seek expert advice.

### Publication of your CIF in IUCr journals

A basic structural check has been run on your CIF. These basic checks will be run on all CIFs submitted for publication in IUCr journals (*Acta Crystallographica*, *Journal of Applied Crystallography*, *Journal of Synchrotron Radiation*); however, if you intend to submit to *Acta Crystallographica Section C* or *E*, you should make sure that full publication checks are run on the final version of your CIF prior to submission.

### Publication of your CIF in other journals

Please refer to the *Notes for Authors* of the relevant journal for any special instructions relating to CIF submission.

---

**PLATON version of 20/08/2014; check.def file version of 18/08/2014**

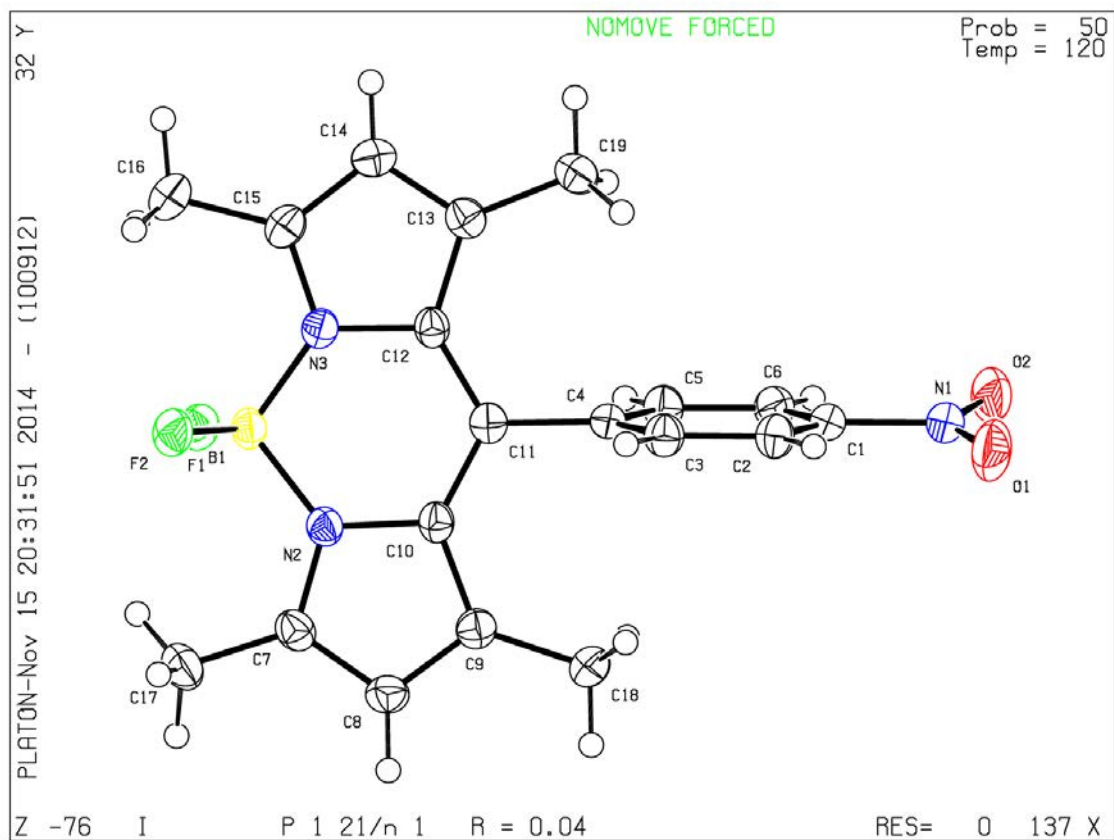

# checkCIF/PLATON report

You have not supplied any structure factors. As a result the full set of tests cannot be run.

THIS REPORT IS FOR GUIDANCE ONLY. IF USED AS PART OF A REVIEW PROCEDURE FOR PUBLICATION, IT SHOULD NOT REPLACE THE EXPERTISE OF AN EXPERIENCED CRYSTALLOGRAPHIC REFEREE.

No syntax errors found.      CIF dictionary      Interpreting this report

## Datablock: I

---

|                 |                                                   |                          |
|-----------------|---------------------------------------------------|--------------------------|
| Bond precision: | C-C = 0.0031 A                                    | Wavelength=0.71073       |
| Cell:           | a=16.4780(12)      b=7.1238(5)      c=17.2258(12) |                          |
|                 | alpha=90      beta=101.934(4)      gamma=90       |                          |
| Temperature:    | 120 K                                             |                          |
|                 | Calculated                                        | Reported                 |
| Volume          | 1978.4(2)                                         | 1978.4(2)                |
| Space group     | P 21/n                                            | P 1 21/n 1               |
| Hall group      | -P 2yn                                            | -P 2yn                   |
| Moiety formula  | C19 H20 B F2 N3, C2 H6 O                          | C19 H20 B F2 N3, C2 H6 O |
| Sum formula     | C21 H26 B F2 N3 O                                 | C21 H26 B F2 N3 O        |
| Mr              | 385.26                                            | 385.26                   |
| Dx,g cm-3       | 1.293                                             | 1.293                    |
| Z               | 4                                                 | 4                        |
| Mu (mm-1)       | 0.093                                             | 0.093                    |
| F000            | 816.0                                             | 816.0                    |
| F000'           | 816.38                                            |                          |
| h,k,lmax        | 19,8,20                                           | 19,8,20                  |
| Nref            | 3515                                              | 3510                     |
| Tmin,Tmax       | 0.968,0.988                                       | 0.970,0.990              |
| Tmin'           | 0.965                                             |                          |

Correction method= MULTI-SCAN

Data completeness= 0.999      Theta(max)= 25.040

R(reflections)= 0.0525( 2624)      wR2(reflections)= 0.1582( 3510)

S = 1.040      Npar= 265

---

The following ALERTS were generated. Each ALERT has the format  
**test-name\_ALERT\_alert-type\_alert-level.**  
Click on the hyperlinks for more details of the test.

---

## ● Alert level G

|                   |                                                  |        |        |
|-------------------|--------------------------------------------------|--------|--------|
| PLAT002_ALERT_2_G | Number of Distance or Angle Restraints on AtSite | 3      | Note   |
| PLAT005_ALERT_5_G | No _iucr_refine_instructions_details in the CIF  | Please | Do !   |
| PLAT007_ALERT_5_G | Number of Unrefined Donor-H Atoms .....          | 1      | Report |
| PLAT066_ALERT_1_G | Predicted and Reported Tmin&Tmax Range Identical | ?      | Check  |
| PLAT860_ALERT_3_G | Number of Least-Squares Restraints .....         | 2      | Note   |

- 
- 0 **ALERT level A** = Most likely a serious problem - resolve or explain  
0 **ALERT level B** = A potentially serious problem, consider carefully  
0 **ALERT level C** = Check. Ensure it is not caused by an omission or oversight  
5 **ALERT level G** = General information/check it is not something unexpected
- 1 ALERT type 1 CIF construction/syntax error, inconsistent or missing data  
1 ALERT type 2 Indicator that the structure model may be wrong or deficient  
1 ALERT type 3 Indicator that the structure quality may be low  
0 ALERT type 4 Improvement, methodology, query or suggestion  
2 ALERT type 5 Informative message, check
- 

It is advisable to attempt to resolve as many as possible of the alerts in all categories. Often the minor alerts point to easily fixed oversights, errors and omissions in your CIF or refinement strategy, so attention to these fine details can be worthwhile. In order to resolve some of the more serious problems it may be necessary to carry out additional measurements or structure refinements. However, the purpose of your study may justify the reported deviations and the more serious of these should normally be commented upon in the discussion or experimental section of a paper or in the "special\_details" fields of the CIF. checkCIF was carefully designed to identify outliers and unusual parameters, but every test has its limitations and alerts that are not important in a particular case may appear. Conversely, the absence of alerts does not guarantee there are no aspects of the results needing attention. It is up to the individual to critically assess their own results and, if necessary, seek expert advice.

### Publication of your CIF in IUCr journals

A basic structural check has been run on your CIF. These basic checks will be run on all CIFs submitted for publication in IUCr journals (*Acta Crystallographica*, *Journal of Applied Crystallography*, *Journal of Synchrotron Radiation*); however, if you intend to submit to *Acta Crystallographica Section C* or *E*, you should make sure that full publication checks are run on the final version of your CIF prior to submission.

### Publication of your CIF in other journals

Please refer to the *Notes for Authors* of the relevant journal for any special instructions relating to CIF submission.

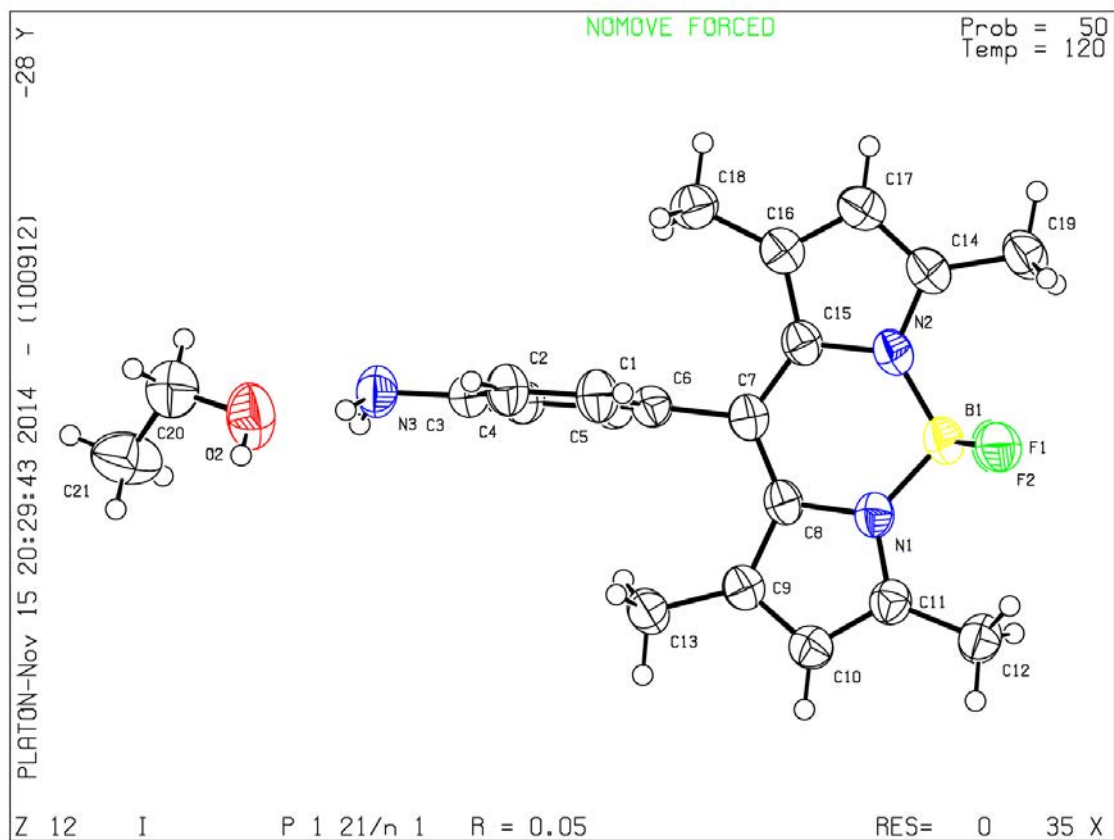

# checkCIF/PLATON report

You have not supplied any structure factors. As a result the full set of tests cannot be run.

THIS REPORT IS FOR GUIDANCE ONLY. IF USED AS PART OF A REVIEW PROCEDURE FOR PUBLICATION, IT SHOULD NOT REPLACE THE EXPERTISE OF AN EXPERIENCED CRYSTALLOGRAPHIC REFEREE.

No syntax errors found.      CIF dictionary      Interpreting this report

## Datablock: I

---

|                 |                              |                                     |
|-----------------|------------------------------|-------------------------------------|
| Bond precision: | C-C = 0.0113 A               | Wavelength=0.71073                  |
| Cell:           | a=8.5150(5)                  | b=9.7941(6)      c=17.2071(10)      |
|                 | alpha=76.580(3)              | beta=76.491(3)      gamma=75.658(4) |
| Temperature:    | 150 K                        |                                     |
|                 | Calculated                   | Reported                            |
| Volume          | 1328.51(14)                  | 1328.51(14)                         |
| Space group     | P -1                         | P -1                                |
| Hall group      | -P 1                         | -P 1                                |
| Moiety formula  | C22 H27 B F2 N3, C H2 Cl2, I | C22 H27 B F2 N3, C H2 Cl2, I        |
| Sum formula     | C23 H29 B Cl2 F2 I N3        | C23 H29 B Cl2 F2 I N3               |
| Mr              | 594.10                       | 594.10                              |
| Dx,g cm-3       | 1.485                        | 1.485                               |
| Z               | 2                            | 2                                   |
| Mu (mm-1)       | 1.436                        | 1.436                               |
| F000            | 596.0                        | 596.0                               |
| F000'           | 595.85                       |                                     |
| h,k,lmax        | 10,11,20                     | 10,11,20                            |
| Nref            | 4688                         | 4684                                |
| Tmin,Tmax       | 0.886,0.904                  | 0.720,0.910                         |
| Tmin'           | 0.806                        |                                     |

Correction method= MULTI-SCAN

Data completeness= 0.999      Theta(max)= 25.000

R(reflections)= 0.0852( 3021)      wR2(reflections)= 0.2288( 4684)

S = 1.091      Npar= 296

---

The following ALERTS were generated. Each ALERT has the format

**test-name\_ALERT\_alert-type\_alert-level.**

Click on the hyperlinks for more details of the test.

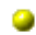

### Alert level C

|                       |                                           |             |
|-----------------------|-------------------------------------------|-------------|
| PLAT242_ALERT_2_C Low | Ueq as Compared to Neighbors for .....    | N3 Check    |
| PLAT244_ALERT_4_C Low | 'Solvent' Ueq as Compared to Neighbors of | C1 Check    |
| PLAT342_ALERT_3_C Low | Bond Precision on C-C Bonds .....         | 0.0113 Ang. |

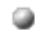

### Alert level G

|                          |                                                  |            |
|--------------------------|--------------------------------------------------|------------|
| PLAT083_ALERT_2_G SHELXL | Second Parameter in WGHT Unusually Large.        | 6.10 Why ? |
| PLAT605_ALERT_4_G        | Structure Contains Solvent Accessible VOIDS of . | 16 A**3    |
| PLAT869_ALERT_4_G        | ALERTS Related to the use of SQUEEZE Suppressed  | ! Info     |

---

0 **ALERT level A** = Most likely a serious problem - resolve or explain  
 0 **ALERT level B** = A potentially serious problem, consider carefully  
 3 **ALERT level C** = Check. Ensure it is not caused by an omission or oversight  
 3 **ALERT level G** = General information/check it is not something unexpected

0 ALERT type 1 CIF construction/syntax error, inconsistent or missing data  
 2 ALERT type 2 Indicator that the structure model may be wrong or deficient  
 1 ALERT type 3 Indicator that the structure quality may be low  
 3 ALERT type 4 Improvement, methodology, query or suggestion  
 0 ALERT type 5 Informative message, check

---

It is advisable to attempt to resolve as many as possible of the alerts in all categories. Often the minor alerts point to easily fixed oversights, errors and omissions in your CIF or refinement strategy, so attention to these fine details can be worthwhile. In order to resolve some of the more serious problems it may be necessary to carry out additional measurements or structure refinements. However, the purpose of your study may justify the reported deviations and the more serious of these should normally be commented upon in the discussion or experimental section of a paper or in the "special\_details" fields of the CIF. checkCIF was carefully designed to identify outliers and unusual parameters, but every test has its limitations and alerts that are not important in a particular case may appear. Conversely, the absence of alerts does not guarantee there are no aspects of the results needing attention. It is up to the individual to critically assess their own results and, if necessary, seek expert advice.

### Publication of your CIF in IUCr journals

A basic structural check has been run on your CIF. These basic checks will be run on all CIFs submitted for publication in IUCr journals (*Acta Crystallographica*, *Journal of Applied Crystallography*, *Journal of Synchrotron Radiation*); however, if you intend to submit to *Acta Crystallographica Section C* or *E*, you should make sure that full publication checks are run on the final version of your CIF prior to submission.

### Publication of your CIF in other journals

Please refer to the *Notes for Authors* of the relevant journal for any special instructions relating to CIF submission.

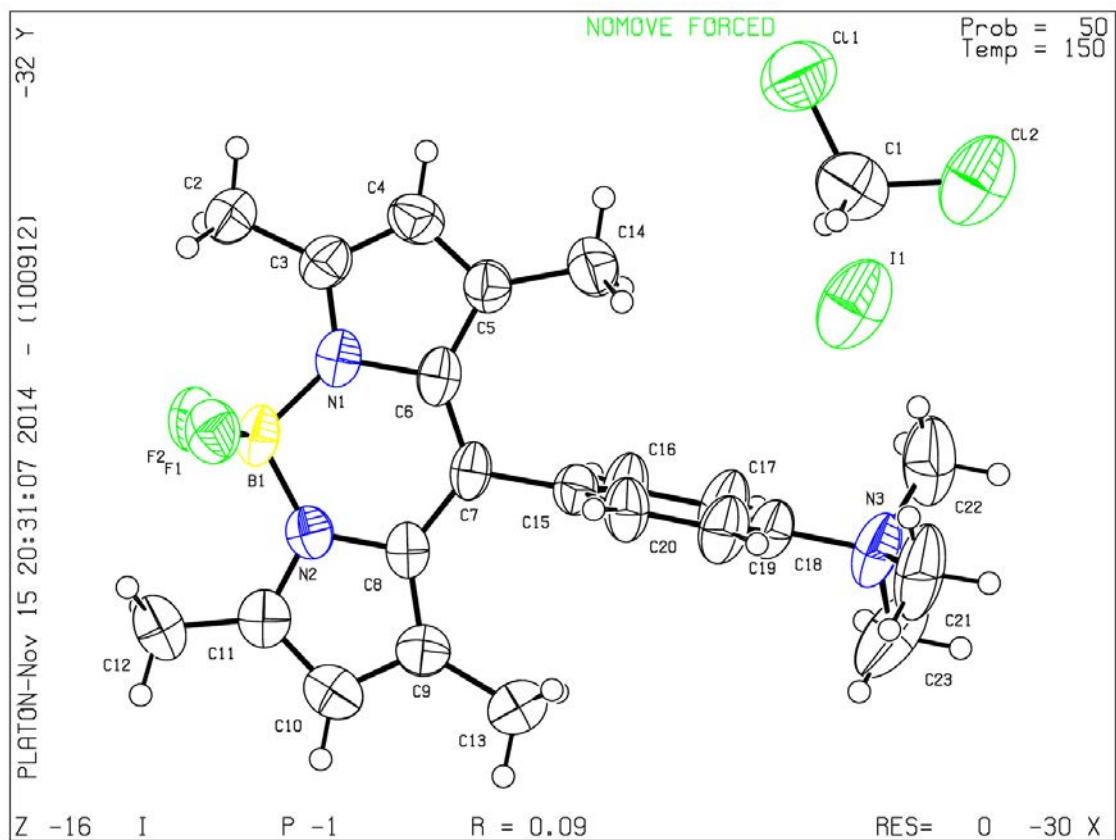

Supplement: c5ob02477c1.pdf [file c5ob02477c1.pdf]
